# Supplementary material
Source: HighWire-hosted journal article supplement (https://bmjopenquality.bmj.com/content/12/3/e002170)
Supplement: inline-supplementary-material-1 [file inline-supplementary-material-1.pdf]

| SPECIMEN TYPE                                                                                                                                                                                                                                                                                                                                                                                                                                                                                                                                                                                                                                                     | COLLECTION INFORMATION                                                                                                                                                                                                                                                                                                                                                                                                               | COLLECTION DEVICE                                                                   |
|-------------------------------------------------------------------------------------------------------------------------------------------------------------------------------------------------------------------------------------------------------------------------------------------------------------------------------------------------------------------------------------------------------------------------------------------------------------------------------------------------------------------------------------------------------------------------------------------------------------------------------------------------------------------|--------------------------------------------------------------------------------------------------------------------------------------------------------------------------------------------------------------------------------------------------------------------------------------------------------------------------------------------------------------------------------------------------------------------------------------|-------------------------------------------------------------------------------------|
| <p><b><u>EYE Culture</u></b></p> <ul style="list-style-type: none"> <li>• Conjunctival Swab</li> </ul> <p><b><u>EAR Culture</u></b></p> <ul style="list-style-type: none"> <li>• Ear Swab</li> <li>• Ear Drainage Swab</li> </ul> <p><b><u>WOUND Swab</u></b></p> <ul style="list-style-type: none"> <li>• Abscess/Cyst</li> <li>• Bite</li> <li>• Burn/Graft</li> <li>• Ulcer</li> <li>• Wound: Deep</li> <li>• Wound: Orthopaedic</li> <li>• Wound: Superficial</li> </ul> <p><b><u>MRSA Single Site Collection</u></b></p> <ul style="list-style-type: none"> <li>• Nasal</li> <li>• Perianal</li> <li>• Urine</li> <li>• Wound Swab (specify site)</li> </ul> | <ol style="list-style-type: none"> <li>1. Remove the swab and avoid touching the swab applicator below the pink scored breakpoint</li> <li>2. Collect the sample by rolling the swab over the site</li> <li>3. Insert the swab all the way into the transport tube and, holding the end of the swab applicator, bend it toward you until it breaks off</li> <li>4. Cap the tube and label with single specimen type label</li> </ol> | 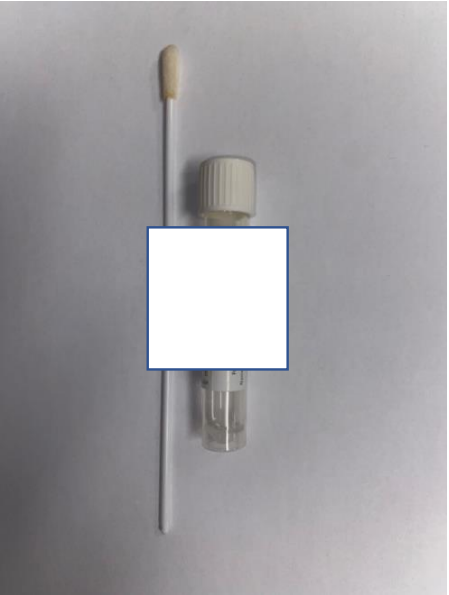 |

| SPECIMEN TYPE                                                                                                                                                                                                        | COLLECTION DEVICE                                                                                                                                                                                                                                                                                                                                                                                                                                                                                                                                                                                                                                                                                                                                                                                                                              | COLLECTION INFORMATION                                                               |
|----------------------------------------------------------------------------------------------------------------------------------------------------------------------------------------------------------------------|------------------------------------------------------------------------------------------------------------------------------------------------------------------------------------------------------------------------------------------------------------------------------------------------------------------------------------------------------------------------------------------------------------------------------------------------------------------------------------------------------------------------------------------------------------------------------------------------------------------------------------------------------------------------------------------------------------------------------------------------------------------------------------------------------------------------------------------------|--------------------------------------------------------------------------------------|
| <p><b><u>MRSA Dual eSwab (Pink Top)</u></b></p> <ul style="list-style-type: none"> <li>If collecting both Nasal and Perianal samples, order only <u>ONE</u> TEST using the specimen type “Nasal/Perianal”</li> </ul> | <ol style="list-style-type: none"> <li>Select the swab with the pink applicator and collect the nasal sample by rotating the swab 5 times in each nostril</li> <li>Dip the swab into the transport tube, swirl for 5 seconds, lift and press the swab on the inside of the tube to drain excess liquid, and discard swab</li> <li>Cap the tube to prevent a spill</li> <li>Using the swab with the white applicator, collect the perianal or rectal sample <u>according to your hospital’s current practice</u></li> <li>Do not touch the white swab applicator below the pink scored breakpoint</li> <li>Insert the swab all the way into the transport tube and, holding the end of the swab applicator, bend it toward you until it breaks off</li> <li>Cap the tube and label using the combined ‘Nasal/Perianal’ specimen type</li> </ol> |  |
